# Supplementary material
Source: Springer Nature journal article supplement (https://www.springermedizin.de/resource/supplementary/13012_2014_782_MOESM1_ESM.pdf/9630684)

Baseline 3 6 8 12 14 18 24

**Provider Study**

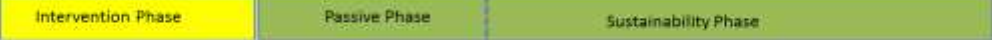

Primary Outcome Measure

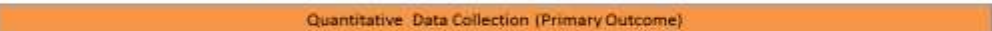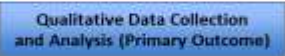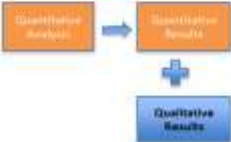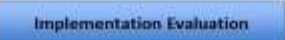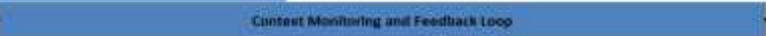

**Patient Study**

Patient Recruitment

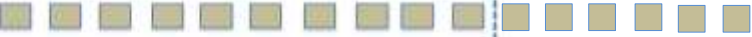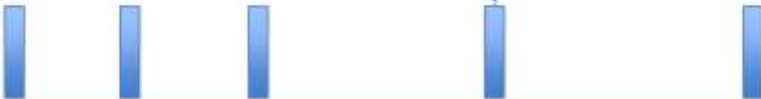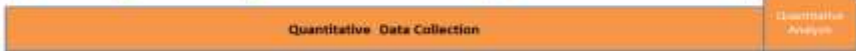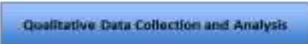

Supplement: MOESM1 [file 9630684]
